# Supplementary material for: Breeding New Premium Quality Cultivars by Citrus Breeding 2.0 in Japan: An Integrative Approach Suggested by Genealogy
Source: MDPI journal article supplement (doi:10.3390/horticulturae8060559), 2022-06-20

Supplemental Figure S1

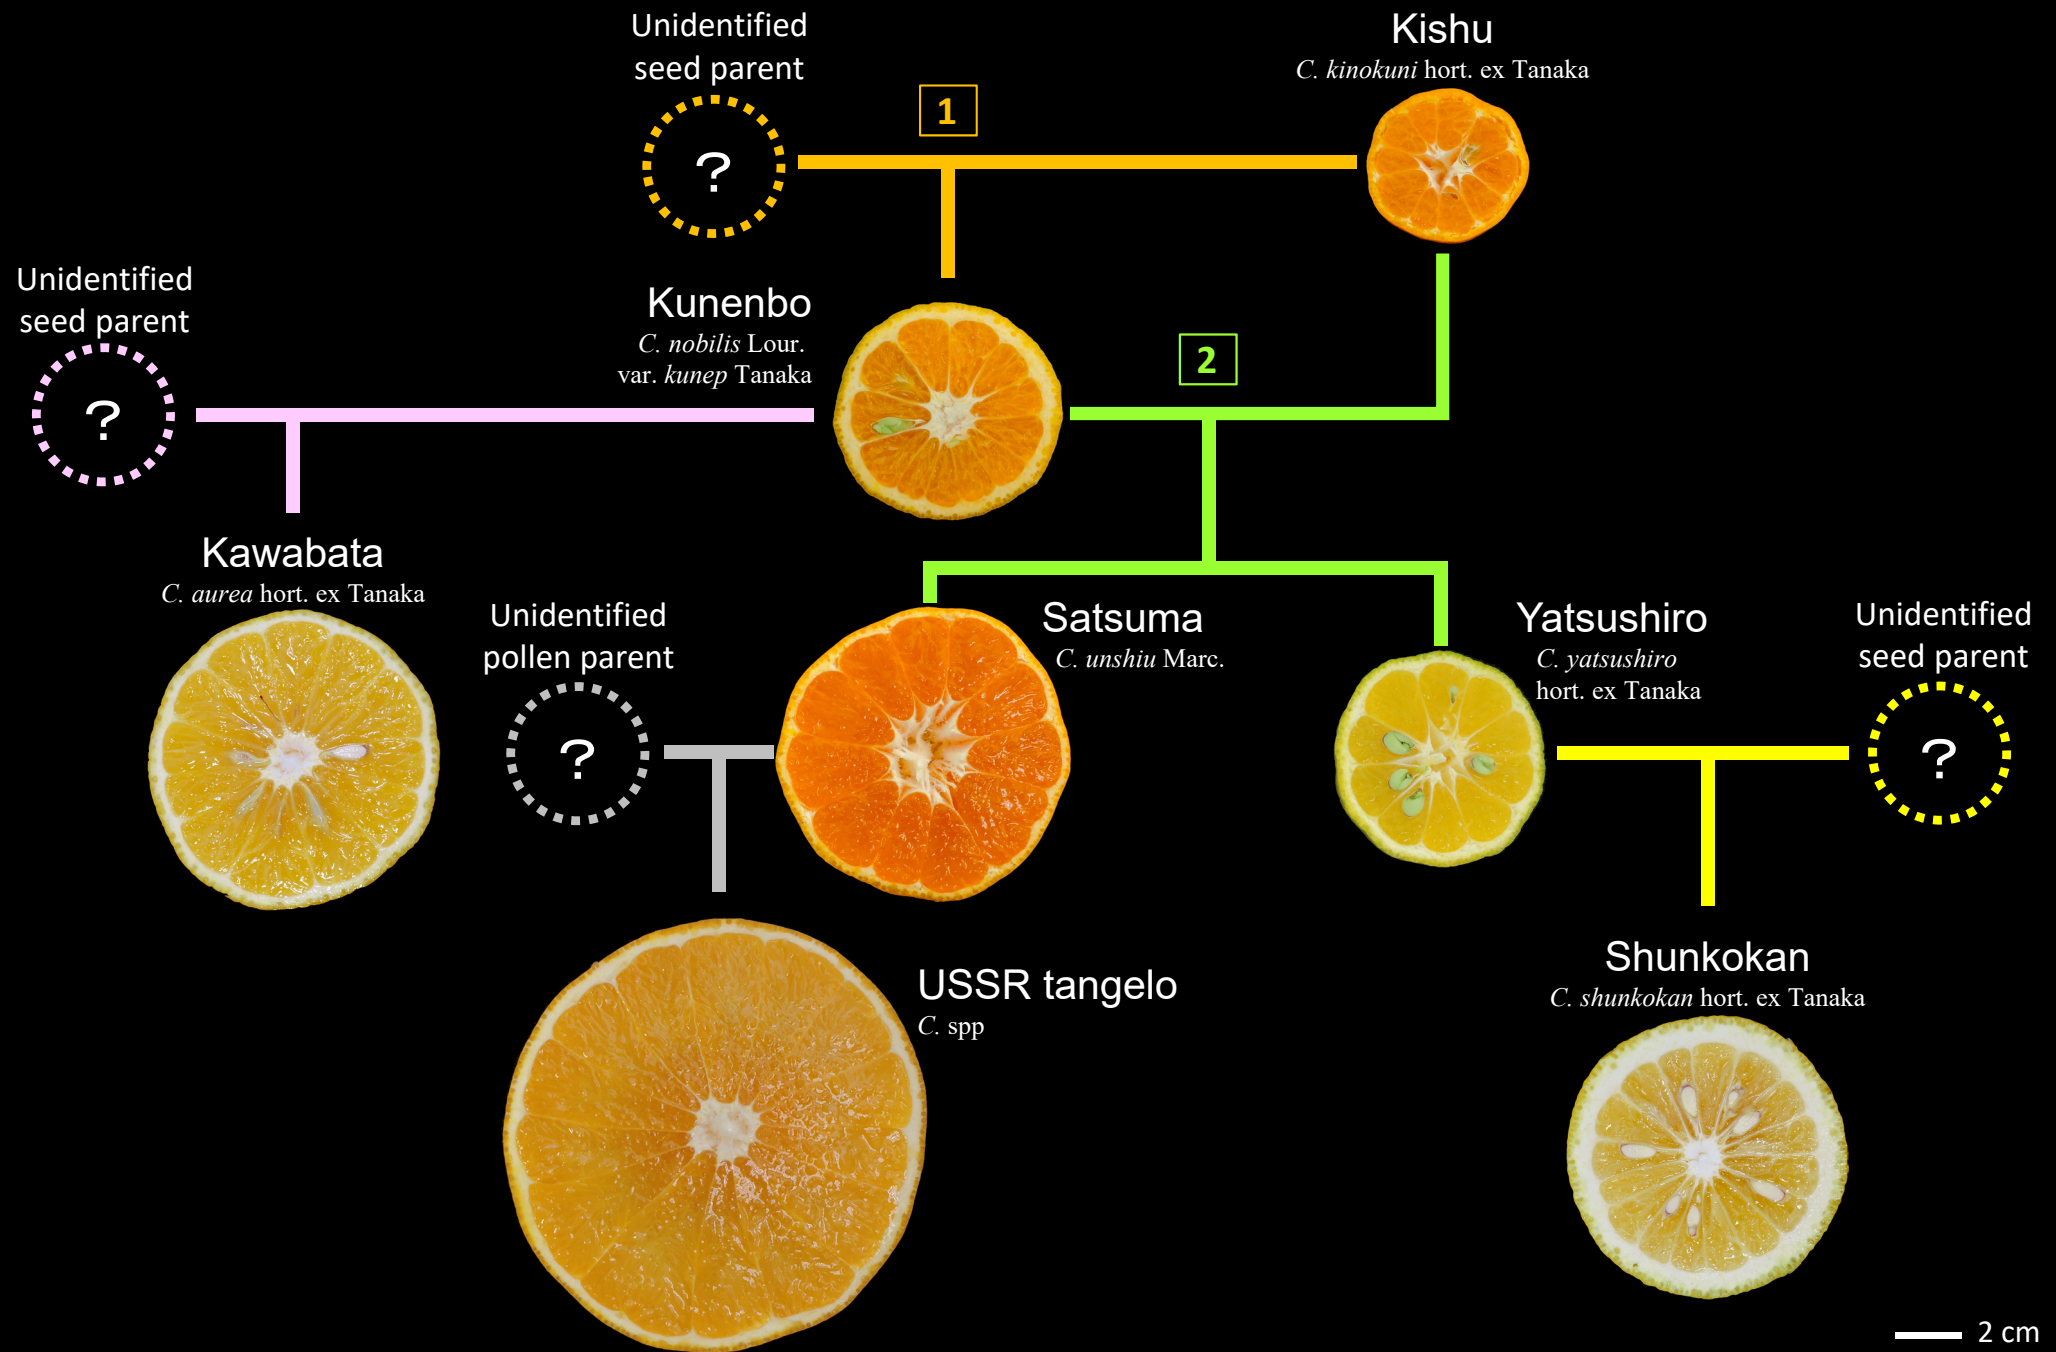

Supplemental Figure S2

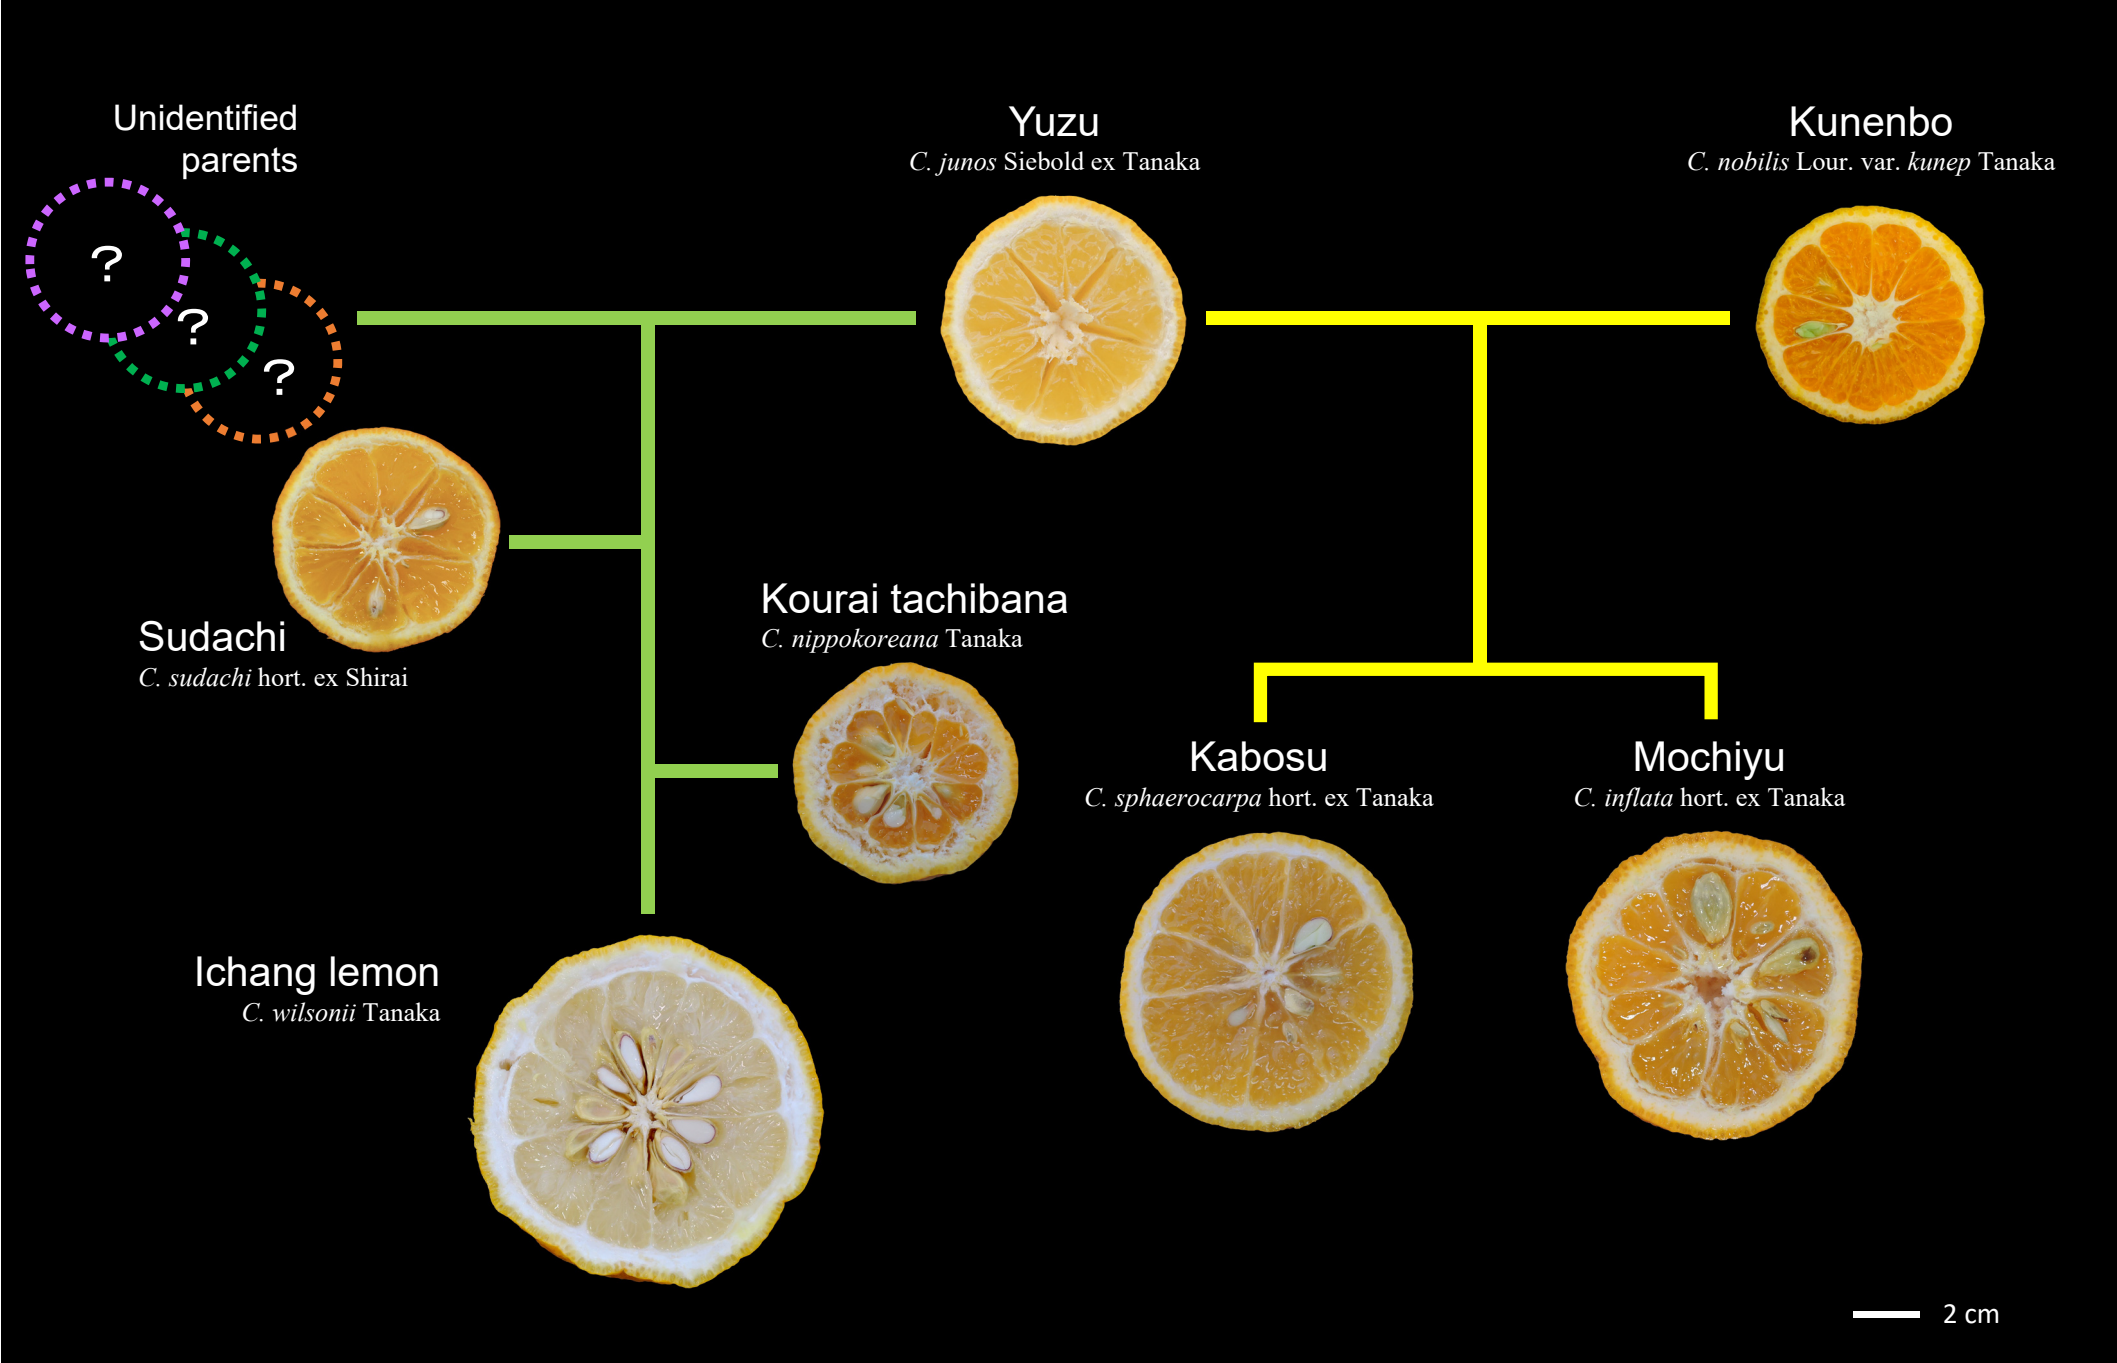

Supplemental Figure S3

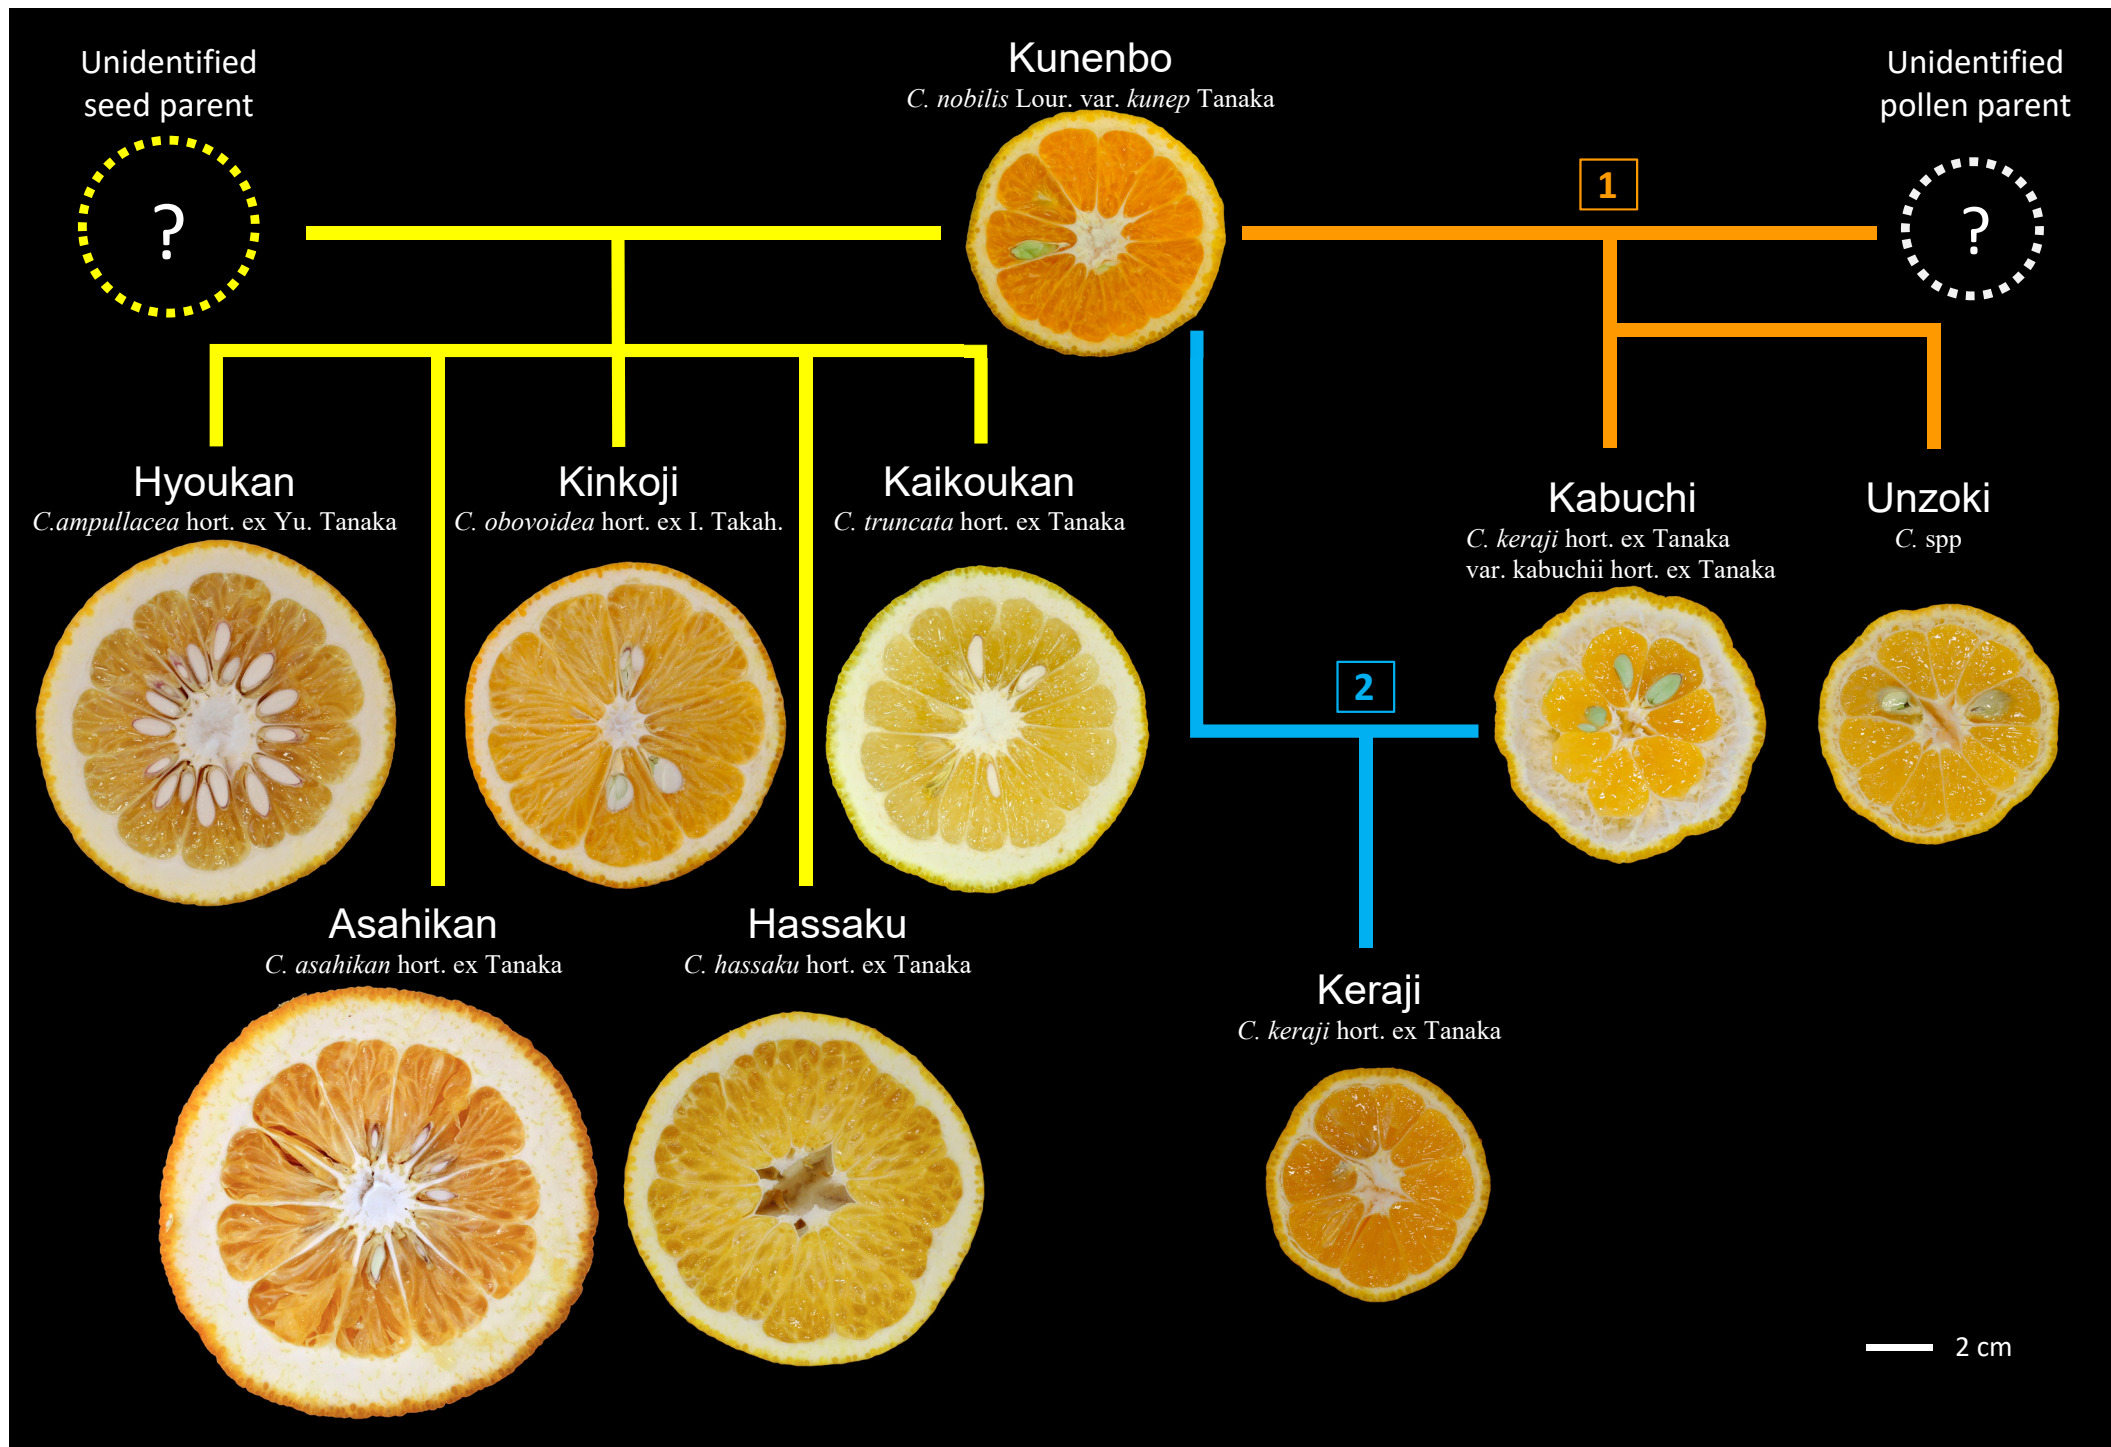



Supplemental Figure S4

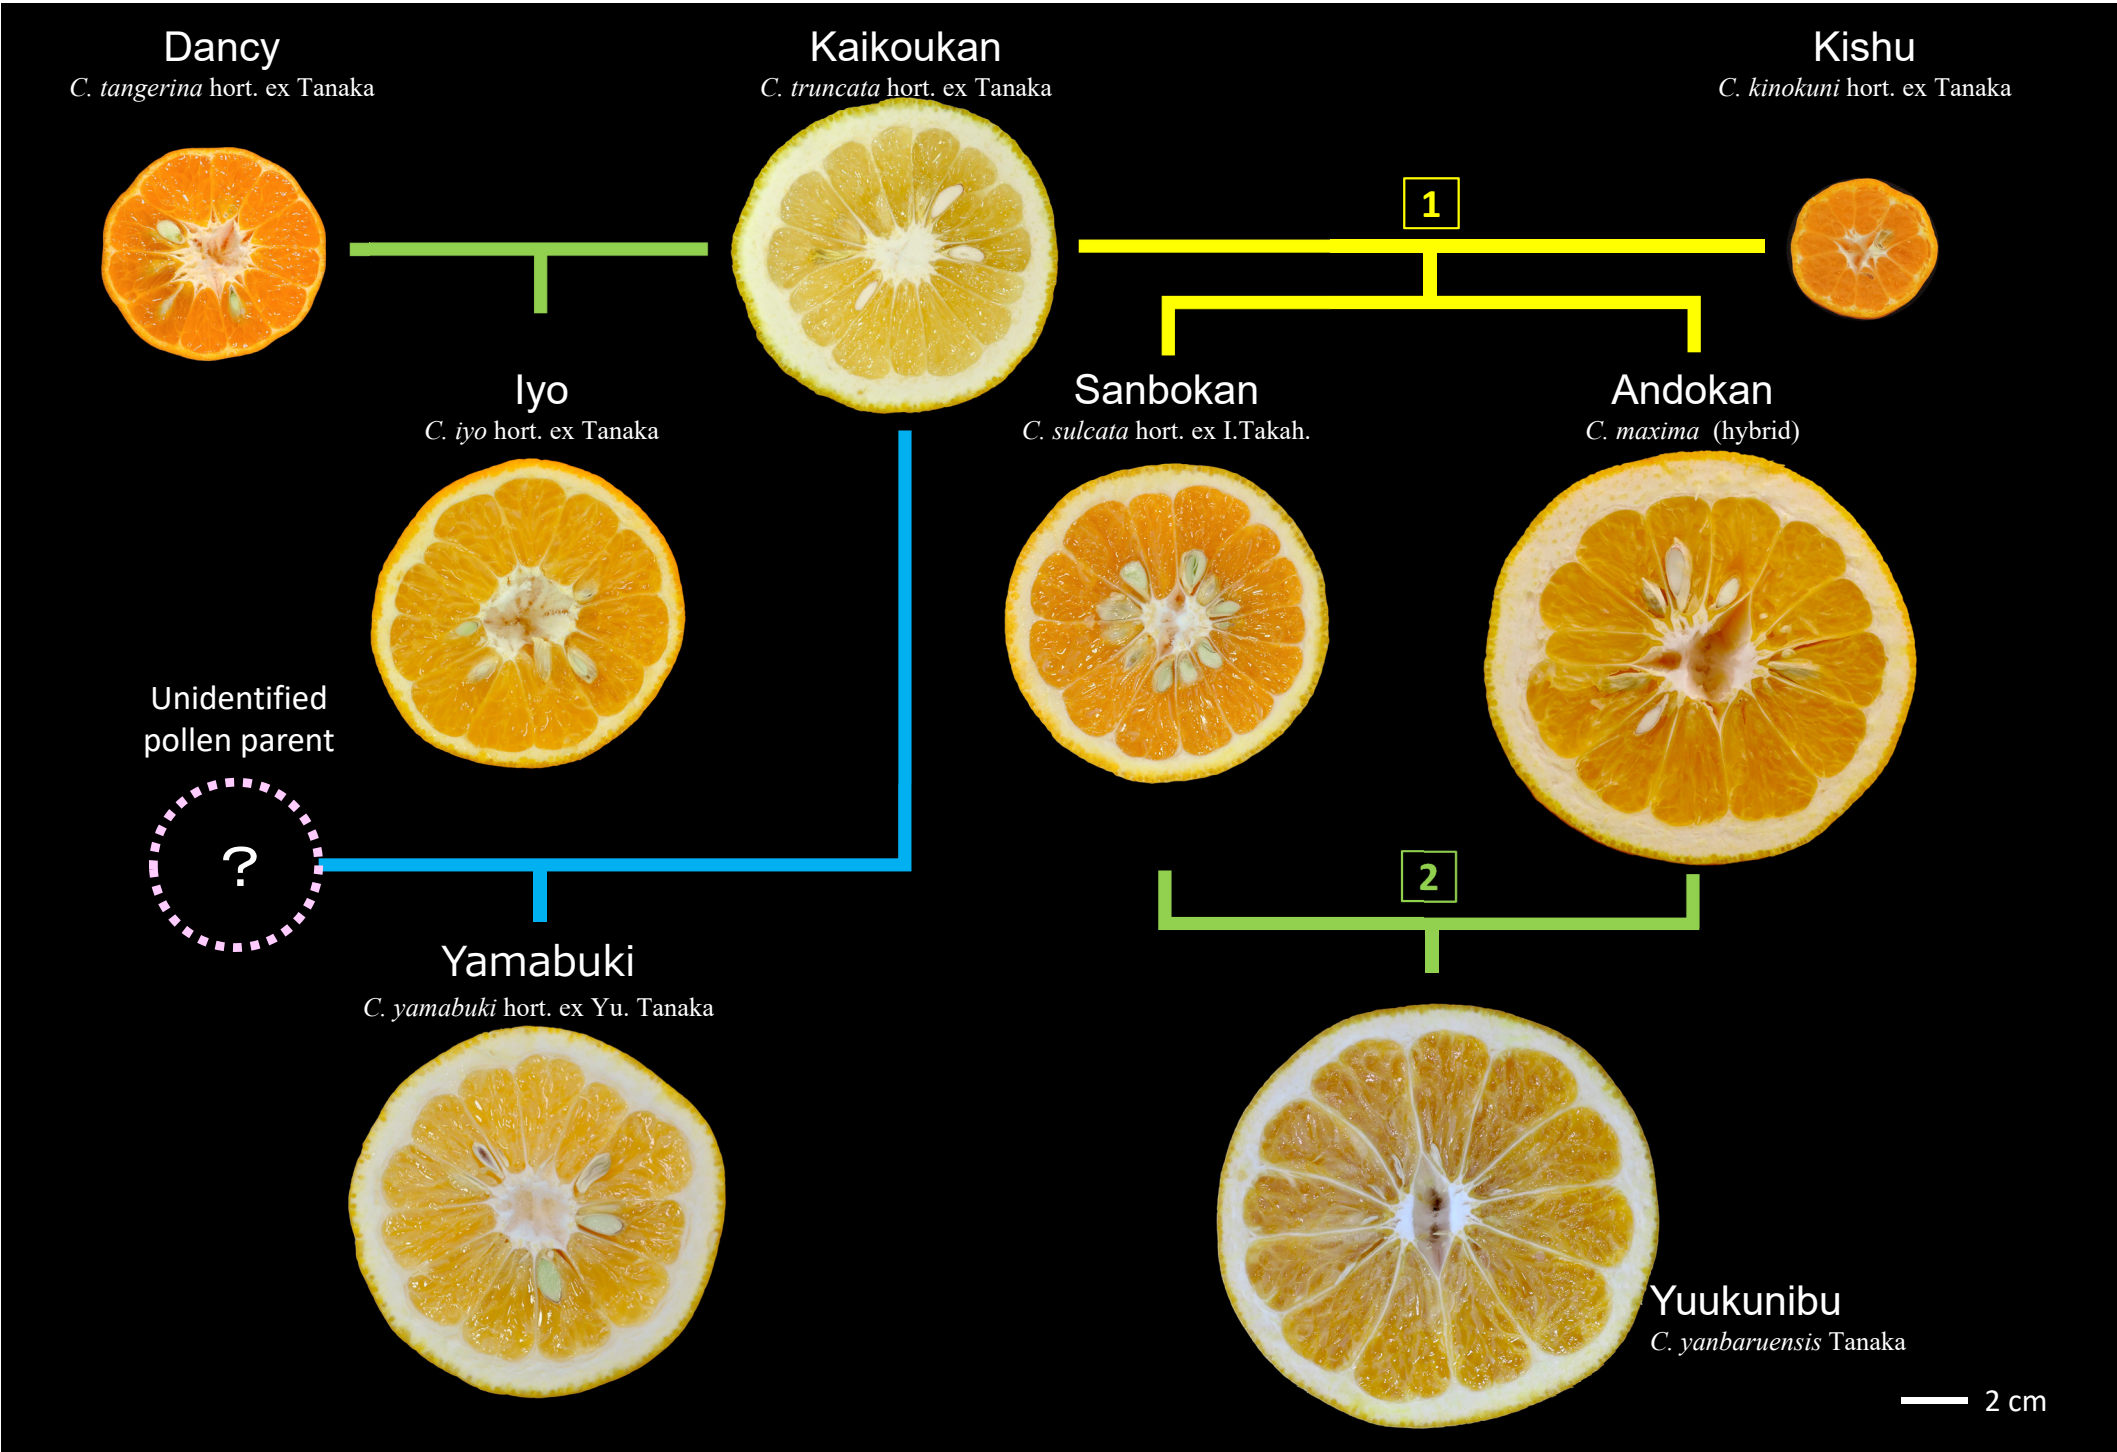

Supplemental Figure S5

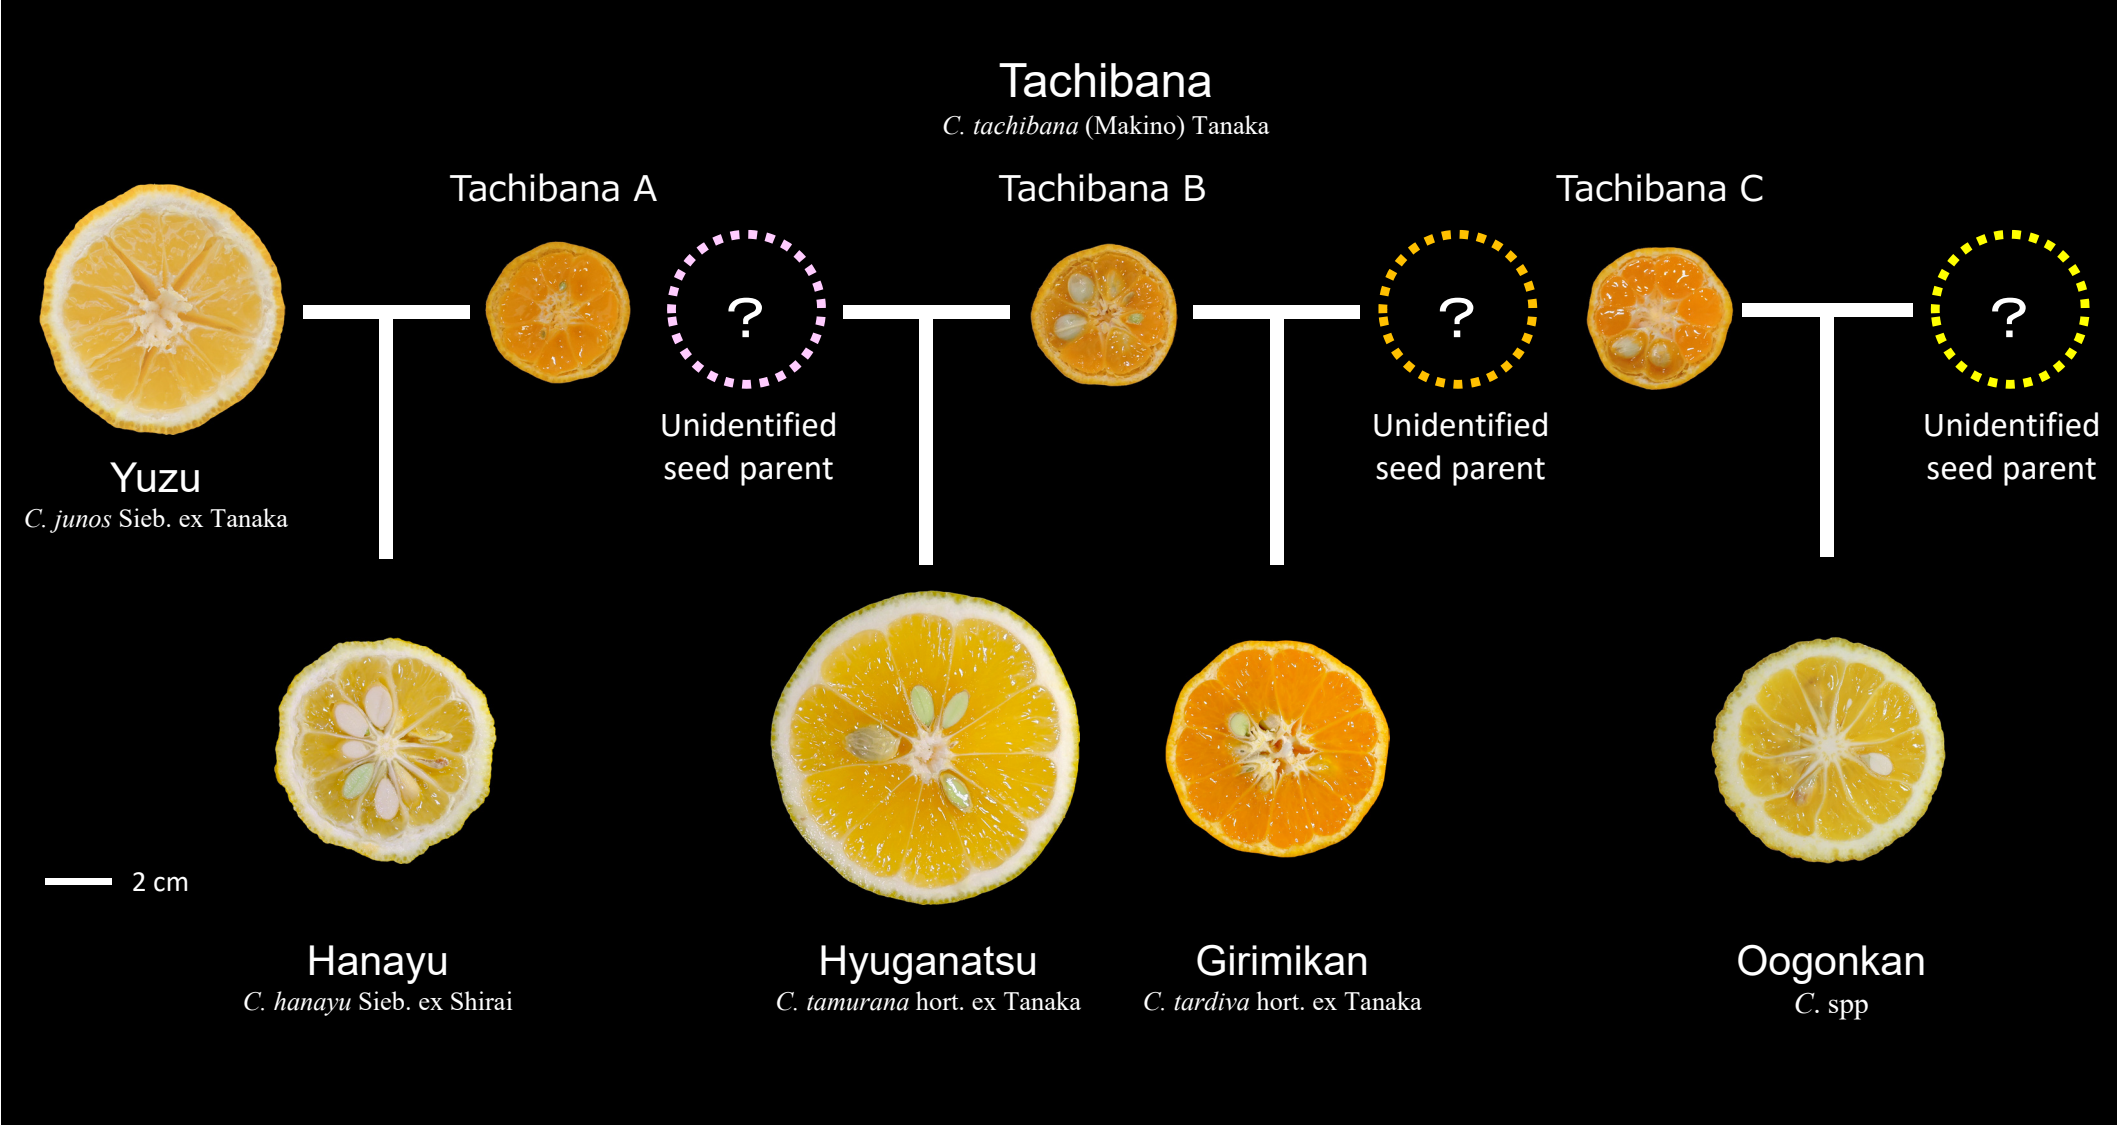

Supplement: s1 [file s1]
